# Supplementary material
Source: MDPI journal article supplement (https://www.mdpi.com/1424-2818/14/10/777)
Supplement: s1 [file s1]

## Supplementary Materials

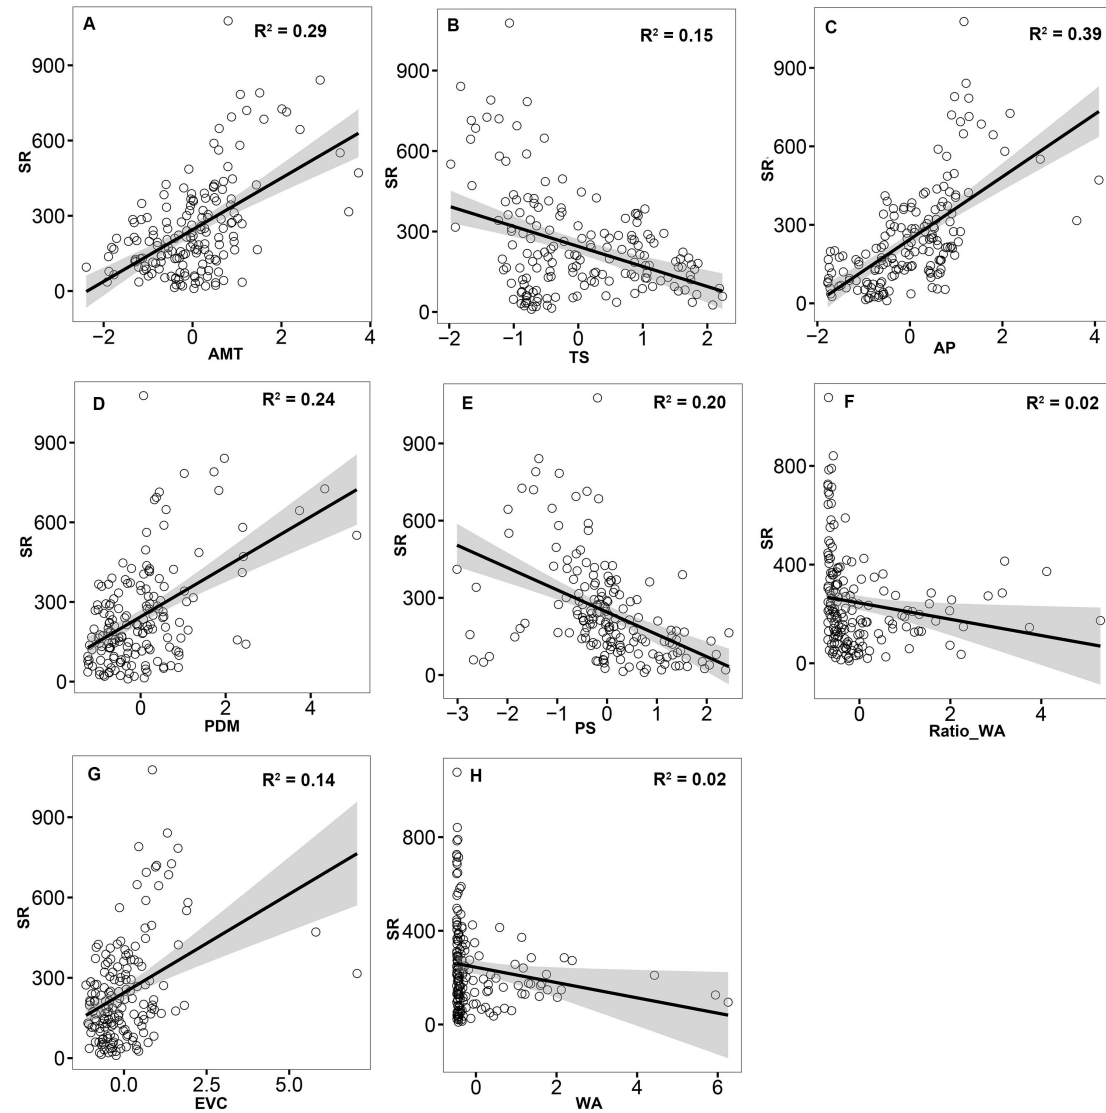

**Figure S1.** Linear relationship between explanatory variables and wetland angiosperm species richness (SR). **(A)** annual mean temperature (AMT); **(B)** temperature seasonality (TS); **(C)** annual precipitation (AP); **(D)** precipitation of driest month (PDM); **(E)** precipitation seasonality (PS); **(F)** ratio of wetland area to county area (Ratio\_WA); **(G)** Elevation variation coefficient (EVC); **(H)** wetland area (WA).
